# Supplementary material
Source: publisher figshare collection journal article supplement (https://acs.figshare.com/ndownloader/files/5735076)
Supplement: Supplementary file 1 [file 5735076]

## Cooperative Host/Guest Interactions via Counterion Assisted Chelation: Pseudorotaxanes from Supramolecular Cryptands

Jason W. Jones<sup>†</sup>, Lev N. Zakharov<sup>‡</sup>, Arnold L. Rheingold<sup>‡</sup>, and Harry W. Gibson<sup>†,\*</sup>

*Virginia Polytechnic Institute and State University, Department of Chemistry, Blacksburg, VA 24061-0212*

*University of Delaware, Department of Chemistry, Newark, DE 19716*

### Supplemental Material (1 page)

**General Experimental Procedures.** Compounds **1**-2PF<sub>6</sub>, **2**, **3**, **5**-2PF<sub>6</sub>, and **7** were prepared as described in the literature (see text for references). Compounds **4**-X and **6**-TFA were purchased commercially and used without further purification.

For every complexation study, precisely weighed amounts of each component were added to a 5.00 mL volumetric flask ( $\pm 0.02$  mL) equipped with a ground glass stopper to make a moderately concentrated (32.0 mM) master solution, which was then sequentially diluted as needed in transferring exactly half of the higher concentration solution to a clean volumetric flask by means of to-deliver volumetric pipettes ( $\pm 0.006$  mL) and diluting to the 5.00 mL mark. The fresh solutions were then passed through a filter before 0.500 mL of each solution component (both host and guest) at a specified concentration was then transferred to a 5 mm NMR tube and <sup>1</sup>H NMR data collected on a temperature controlled Varian Unity 400 MHz spectrometer.

Association constants were estimated according to Eq. 1, where  $\Delta$  represents the difference in  $\delta$  values (ppm) for any given proton between the shift which was observed experimentally upon mixing **2** or **7** (hereafter referred to as **host**) and **1**-2PF<sub>6</sub> or **5**-2PF<sub>6</sub> (hereafter referred to as **guest**) versus the chemical shift of the same given proton of **host** in the absence of **guest**, and where  $\Delta_0$  represents the difference in  $\delta$  values between the chemical shift of the same given proton of **host** in the absence of **guest** versus the chemical shift of fully complexed **host**, which may only be realized by overloading **host** with **guest**. [**Host**]<sub>uc</sub> and [**Guest**]<sub>uc</sub> represent concentrations of uncomplexed host and guest, respectively. For present purposes, we observed the chemical shift of H<sub>b</sub> to derive  $\Delta$  while taking  $\Delta_0$  directly from prior studies as described in the text.

$$\text{apparent } K_a = \frac{[\text{host/guest}]}{[\text{host}]_{uc}[\text{guest}]_{uc}} = \frac{[\text{host}]_0 \frac{\Delta}{\Delta_0}}{\left([\text{host}]_0 - [\text{host}]_0 \frac{\Delta}{\Delta_0}\right) \left([\text{guest}]_0 - [\text{host}]_0 \frac{\Delta}{\Delta_0}\right)} \quad (1)$$

\* Corresponding author, email: hwgibson@vt.edu

<sup>†</sup> Virginia Polytechnic Institute and State University

<sup>‡</sup> University of Delaware
